# Supplementary material
Source: Springer Nature journal article supplement (https://www.springermedizin.de/resource/supplementary/12971_2012_169_MOESM10_ESM.pdf/9595070)

**(A)** FITC

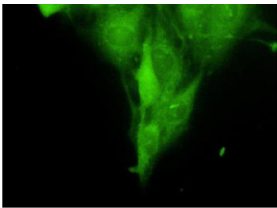

**DAPI**

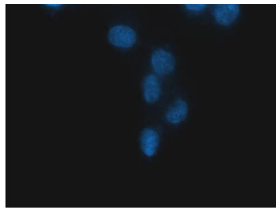

**Merge**

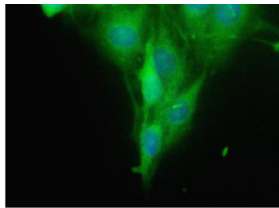

**(B)** FITC

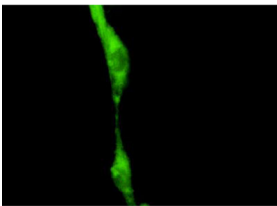

**DAPI**

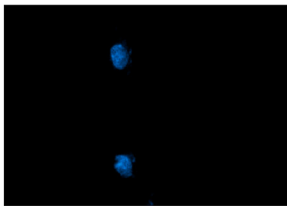

**Merge**

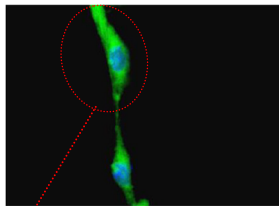

**(C)**

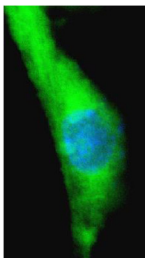

Supplement: MOESM10 [file 9595070]
